# Supplementary material for: Universal Properties and Specificities of the β2-Adrenergic Receptor-Gs Protein Complex Activation Mechanism Revealed by All-Atom Molecular Dynamics Simulations
Source: MDPI journal article supplement (doi:10.3390/ijms221910423), 2021-09-27
Supplement: s1 [file s1]

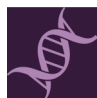

Article

# Universal Properties and Specificities of the $\beta_2$ -Adrenergic Receptor- $G_s$ Protein Complex Activation Mechanism Revealed by All-Atom Molecular Dynamics Simulations.

Argha Mitra <sup>1,2</sup>, Arijit Sarkar <sup>1,2</sup>, Attila Borics <sup>1,\*</sup>

<sup>1</sup> Laboratory of Chemical Biology, Institute of Biochemistry, Biological Research Centre, Szeged, 62. Temesvári krt., H-6726 Szeged, Hungary; argha.mitra@brc.hu (A.M.); sarkar.arajit@brc.hu (A.S.)

<sup>2</sup> Theoretical Medicine Doctoral School, Faculty of Medicine, University of Szeged, 97. Tisza L. krt., H-6722 Szeged, Hungary

\* Correspondence: borics.attila@brc.hu, Phone: +36 62 599 600 ext. 430

## Supplementary materials

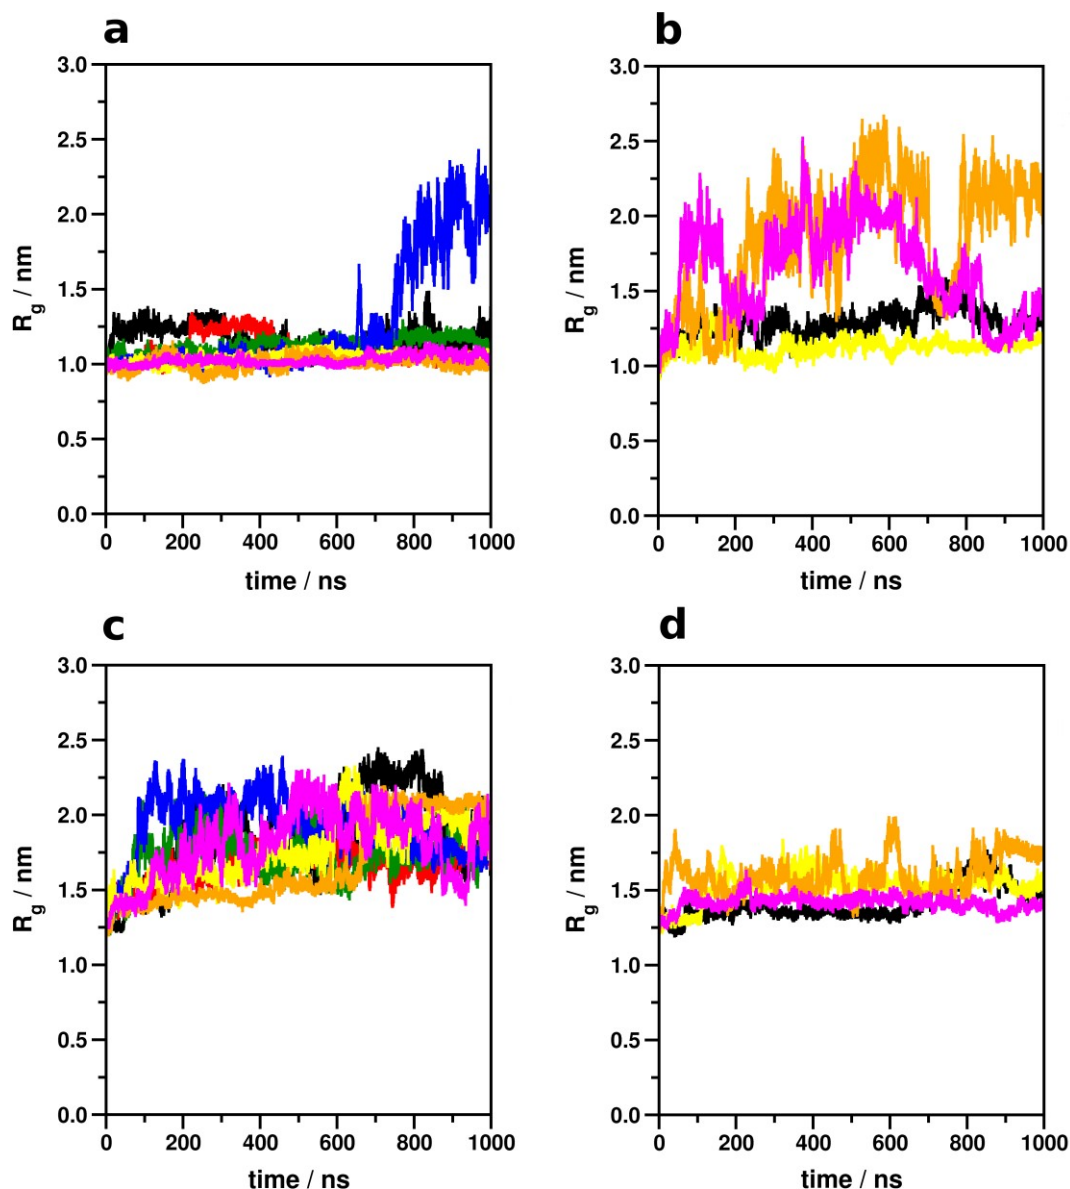

**Figure S1.** The evolution of radii of gyration of the N- (a,b) and C-terminal domains (c,d) of the active (a,c) and inactive state (b,d)  $\beta$ 2AR during production simulations. Black:  $\beta$ 2AR – Gs protein – epinephrine complex, 1st replica; Red:  $\beta$ 2AR – Gs protein – epinephrine complex, 2nd replica; Green:  $\beta$ 2AR – Gs protein – epinephrine complex, 3rd replica; Blue:  $\beta$ 2AR – Gs protein – epinephrine complex, with restrained epinephrine and GDP; Yellow:  $\beta$ 2AR –  $\beta$ -arrestin-2 – epinephrine complex; Orange: ligand-free  $\beta$ 2AR – Gs protein complex; Magenta: ligand-free  $\beta$ 2AR –  $\beta$ -arrestin-2 complex.

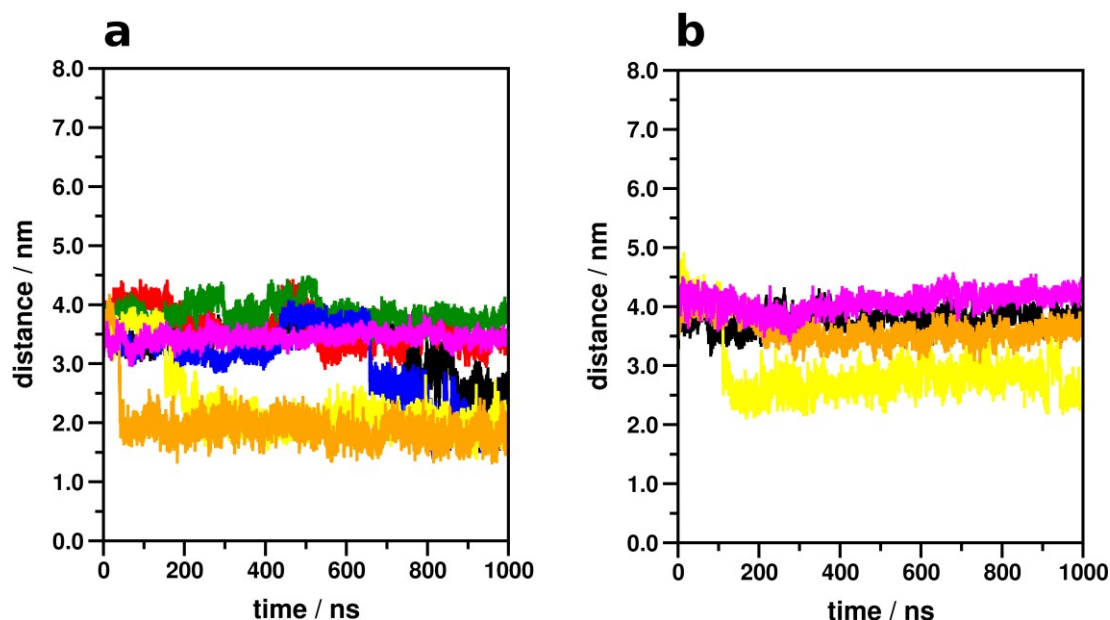

**Figure S2.** Minimum distance between the N- and C-terminal domains (and their periodic replicas) of the active (a) and inactive state (b)  $\beta$ 2AR during production simulations. Black:  $\beta$ 2AR – Gs protein – epinephrine complex, 1st replica; Red:  $\beta$ 2AR – Gs protein – epinephrine complex, 2nd replica; Green:  $\beta$ 2AR – Gs protein – epinephrine complex, 3rd replica; Blue:  $\beta$ 2AR – Gs protein – epinephrine complex, with restrained epinephrine and GDP; Yellow:  $\beta$ 2AR –  $\beta$ -arrestin-2 – epinephrine complex; Orange: ligand-free  $\beta$ 2AR – Gs protein complex; Magenta: ligand-free  $\beta$ 2AR –  $\beta$ -arrestin-2 complex.

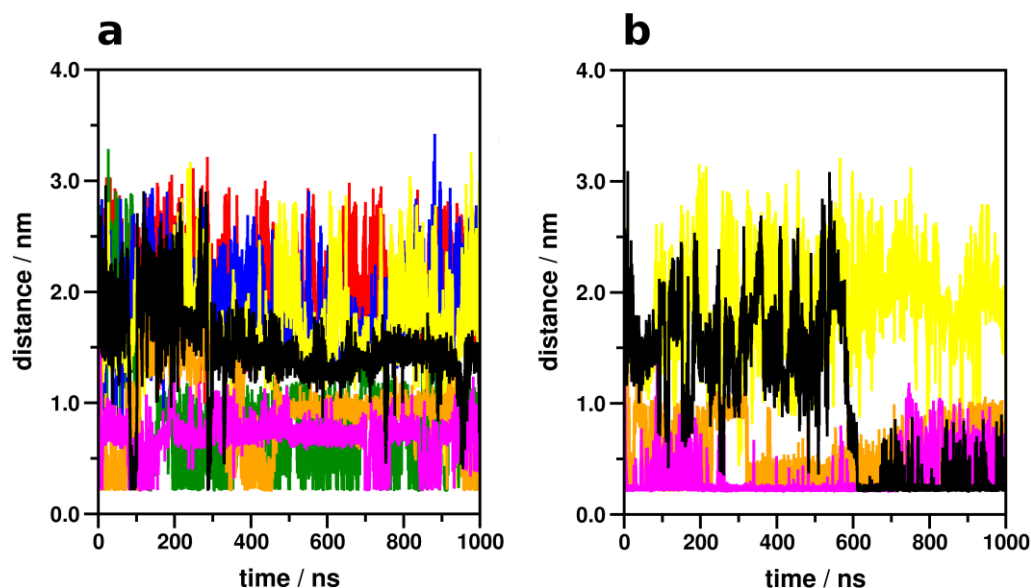

**Figure S3.** Minimum distance between  $\text{Na}^+$  ions and D113<sup>3,32</sup> of the orthosteric binding pocket of the active (a) and inactive state (b)  $\beta$ 2AR during simulations. Black:  $\beta$ 2AR – Gs protein – epinephrine complex, 1st replica; Red:  $\beta$ 2AR – Gs protein – epinephrine complex, 2nd replica; Green:  $\beta$ 2AR – Gs protein – epinephrine complex, 3rd replica; Blue:  $\beta$ 2AR – Gs protein – epinephrine complex, with restrained epinephrine and GDP; Yellow:  $\beta$ 2AR –  $\beta$ -arrestin-2 – epinephrine complex; Orange: ligand-free  $\beta$ 2AR – Gs protein complex; Magenta: ligand-free  $\beta$ 2AR –  $\beta$ -arrestin-2 complex.

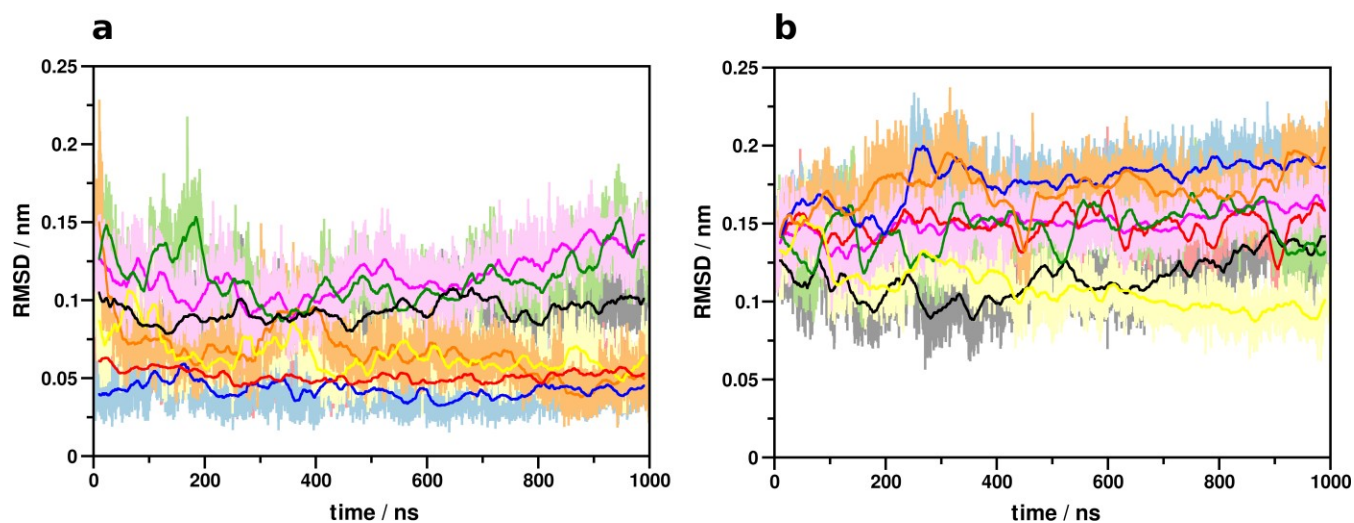

**Figure S4.** Properties of transmembrane helices. **(a)** Deviation from ideal  $\alpha$ -helical geometry in the Gs protein and epinephrine-bound active state. Black: TM1, red: TM2, green: TM3, blue: TM4, yellow: TM5, orange: TM6, magenta: TM7. **(b)** Deviation of TM7 from ideal  $\alpha$ -helical geometry in the active, Gs protein and epinephrine-bound (black: 1<sup>st</sup> replica; red: 2<sup>nd</sup> replica; green: 3<sup>rd</sup> replica; blue: restrained epinephrine and GDP), active,  $\beta$ -arrestin-2 and epinephrine-bound (yellow), active, Gs protein-bound, ligand free (orange) and active,  $\beta$ -arrestin-2-bound, ligand-free states (magenta).

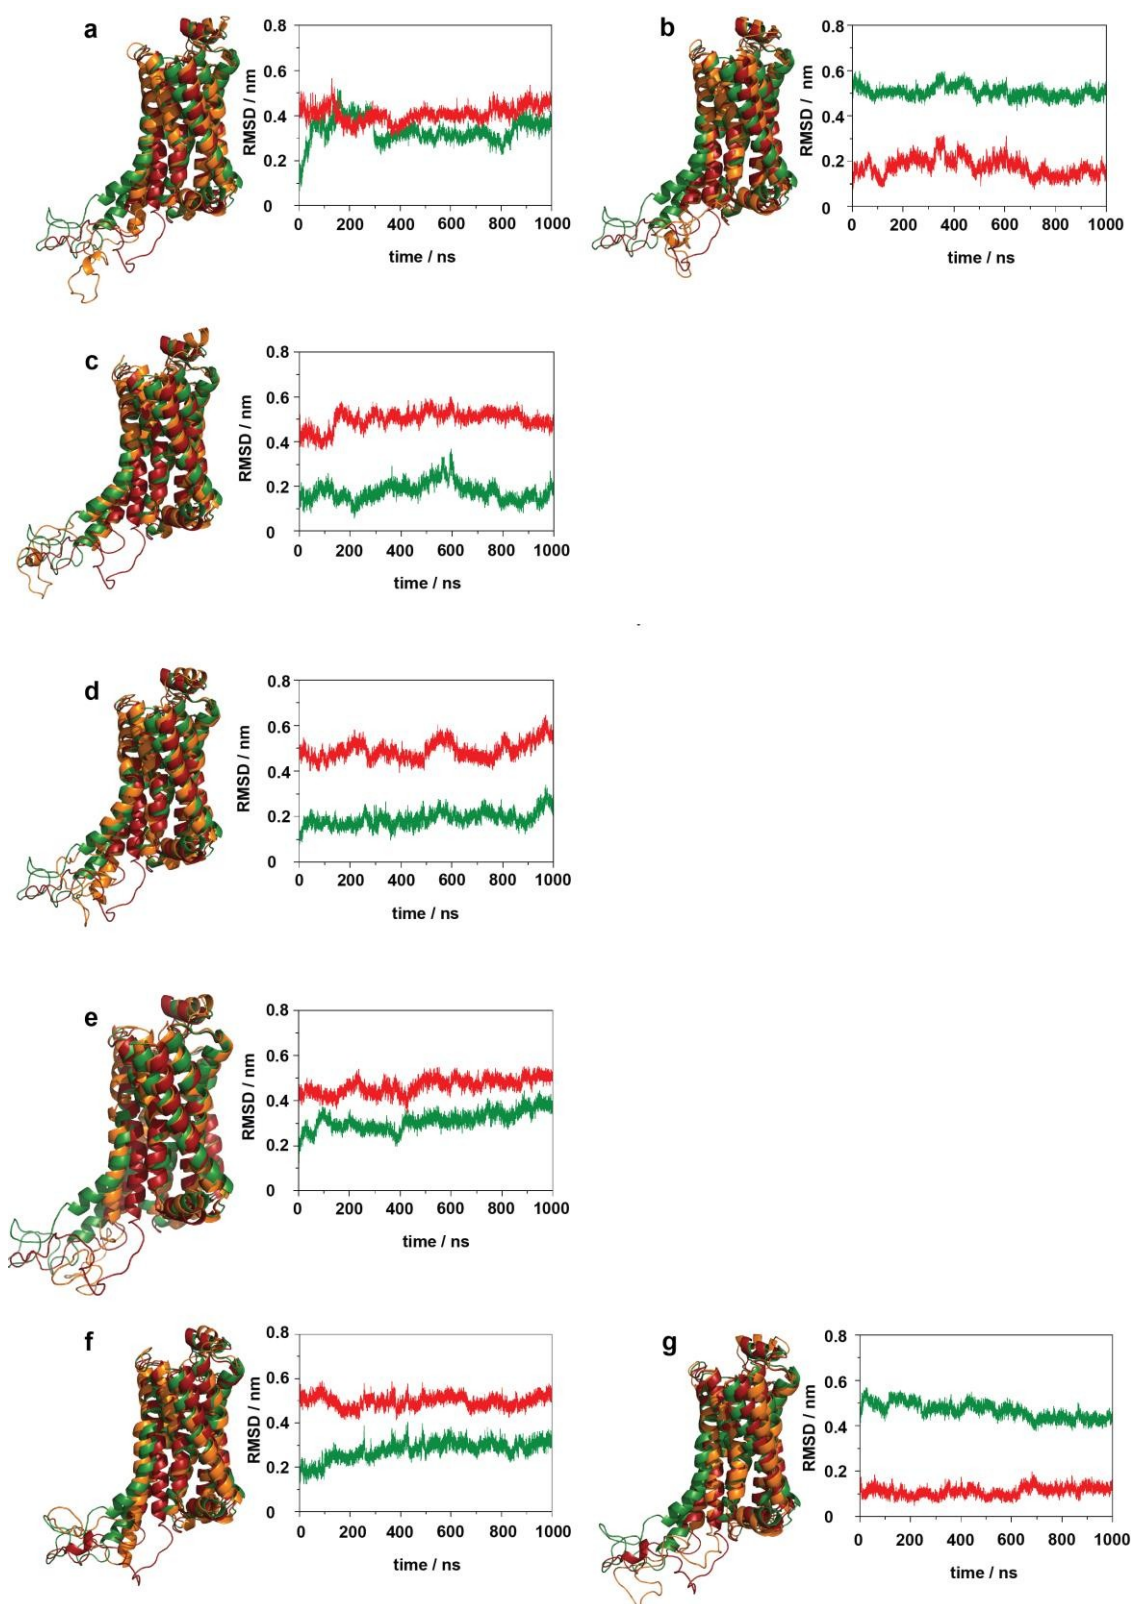

**Figure S5.** Disposition of TM6 during simulations (orange) with respect to the active (green) and inactive (red) crystallographic structures of the  $\beta_2$ AR. (a) active  $\beta_2$ AR –  $G_s$  protein – epinephrine complex, 1st replica; (b) inactive  $\beta_2$ AR –  $G_s$  protein – epinephrine complex; (c) active  $\beta_2$ AR –  $G_s$  protein – epinephrine complex, 2nd replica; (d) active  $\beta_2$ AR –  $G_s$  protein – epinephrine complex, 3rd replica; (e) active  $\beta_2$ AR –  $G_s$  protein – epinephrine complex, with restrained epinephrine and GDP; (f) active  $\beta_2$ AR –  $\beta$ -arrestin-2 – epinephrine complex; (g) inactive  $\beta_2$ AR –  $\beta$ -arrestin-2 – epinephrine complex.



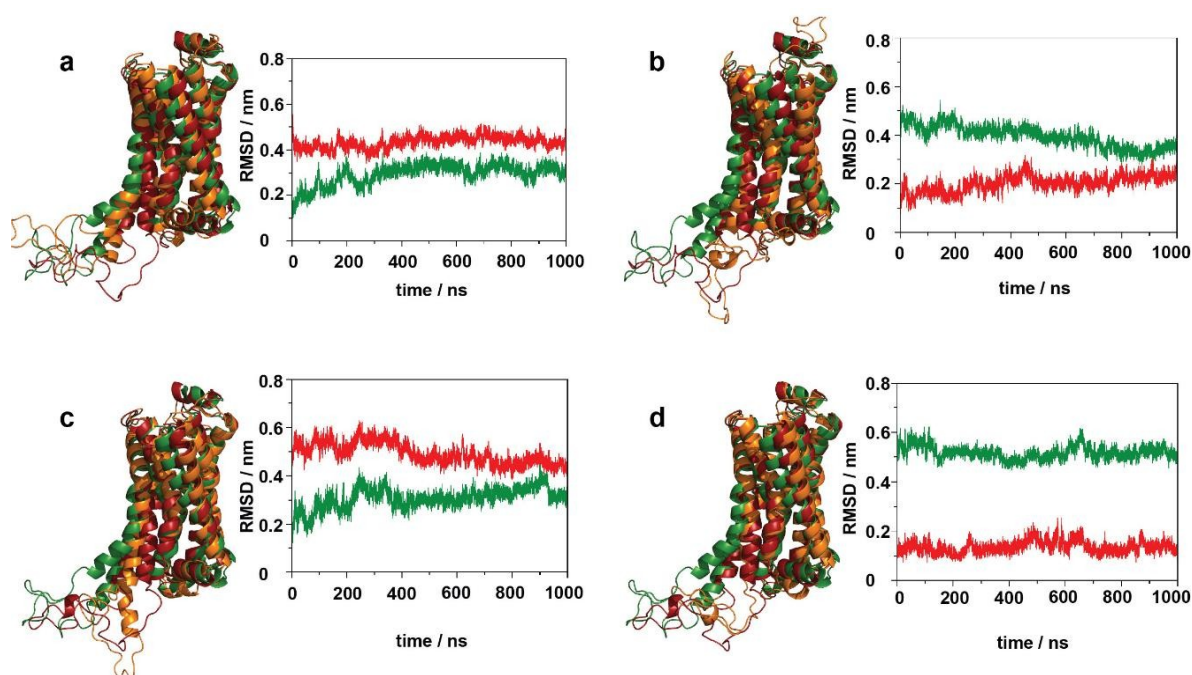

**Figure S6.** Disposition of TM6 during simulations (orange) with respect to the active (green) and inactive (red) crystallographic structures of the  $\beta$ 2AR. (a) active, ligand-free  $\beta$ 2AR – Gs protein complex; (b) inactive, ligand-free  $\beta$ 2AR – Gs protein complex; (c) active, ligand-free  $\beta$ 2AR –  $\beta$ -arrestin-2 complex; (d) inactive, ligand-free  $\beta$ 2AR –  $\beta$ -arrestin-2 complex.

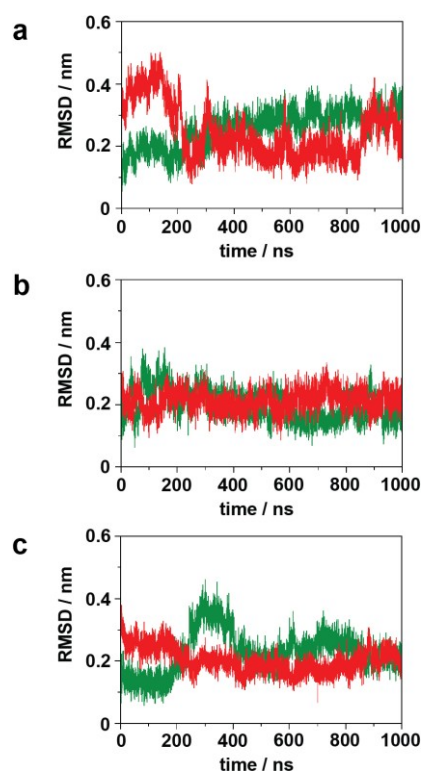

**Figure S7.** Disposition of the NPxxY motif during simulations with respect to the active (green) and inactive (red) crystallographic structures of the  $\beta$ 2AR. (a) active  $\beta$ 2AR – Gs protein – epinephrine complex, 2nd replica; (b) active  $\beta$ 2AR – Gs protein – epinephrine complex, 3rd replica; (c) active  $\beta$ 2AR – Gs protein – epinephrine complex, with restrained epinephrine and GDP.

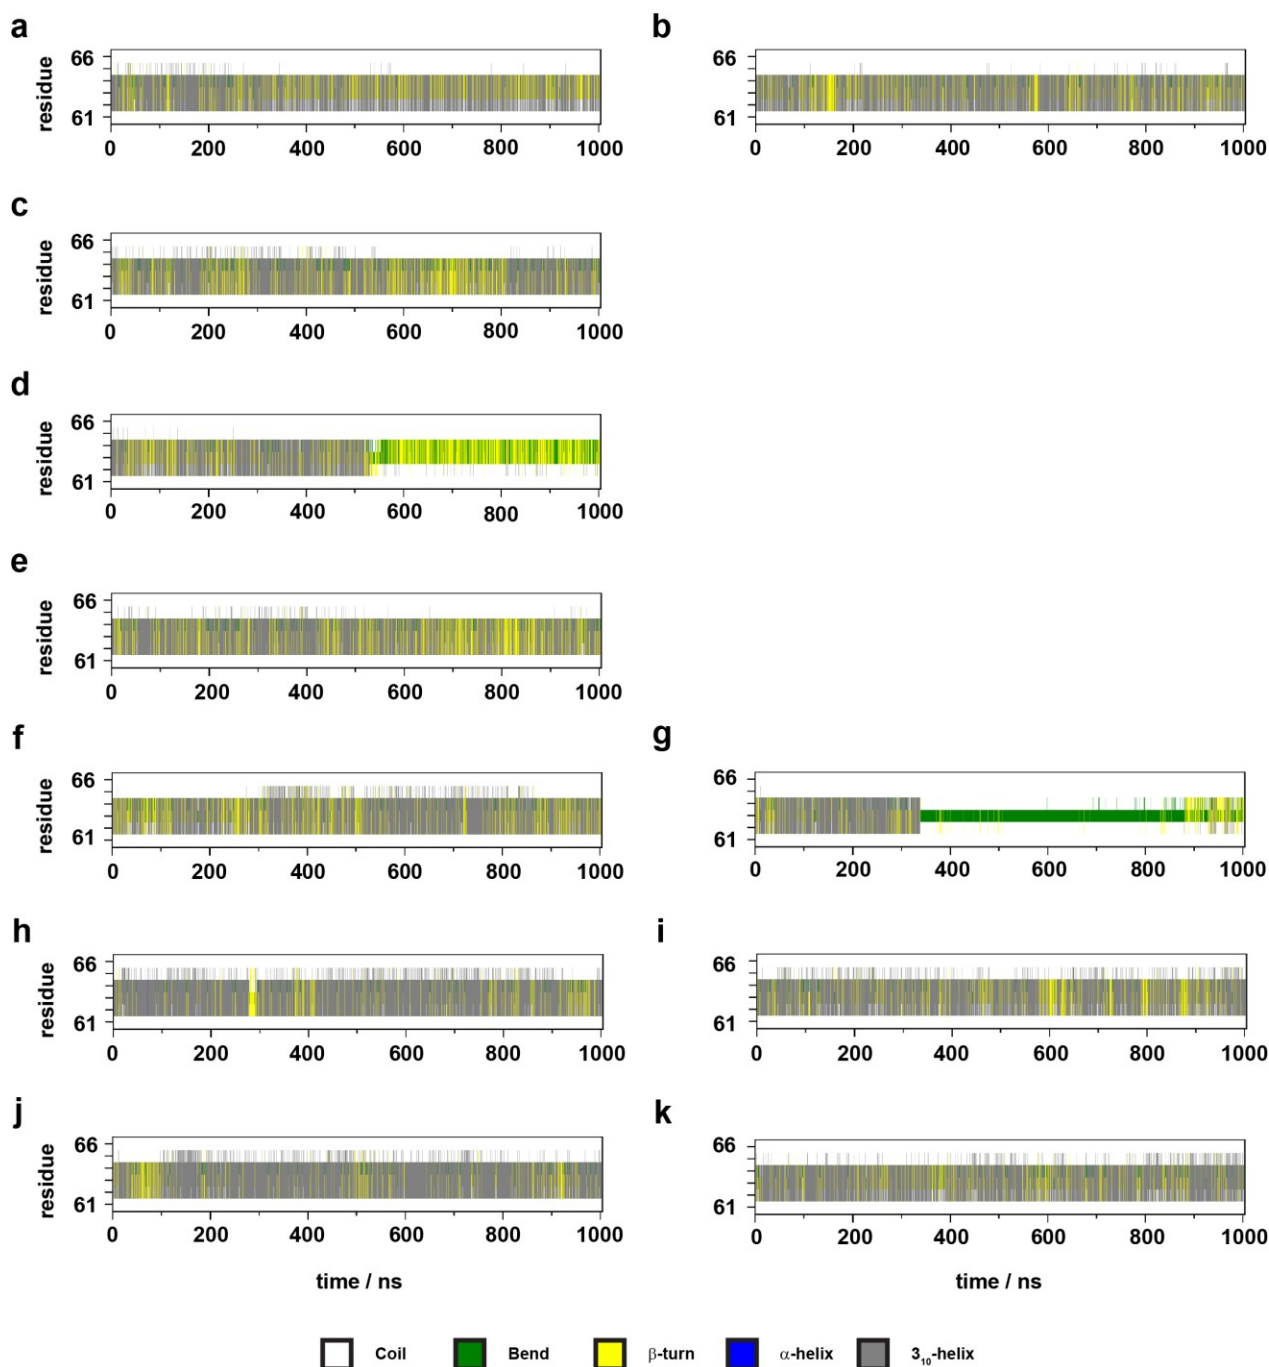

**Figure S8.** Evolution of the secondary structure of ICL1 during simulations. (a) active  $\beta$ 2AR – Gs protein – epinephrine complex, 1st replica; (b) inactive  $\beta$ 2AR – Gs protein – epinephrine complex; (c) active  $\beta$ 2AR – Gs protein – epinephrine complex, 2nd replica; (d) active  $\beta$ 2AR – Gs protein – epinephrine complex, 3rd replica; (e) active  $\beta$ 2AR – Gs protein – epinephrine complex, with restrained epinephrine and GDP; (f) active  $\beta$ 2AR –  $\beta$ -arrestin-2 – epinephrine complex; (g) inactive  $\beta$ 2AR –  $\beta$ -arrestin-2 – epinephrine complex; (h) active, ligand-free  $\beta$ 2AR – Gs protein complex; (i) inactive, ligand-free  $\beta$ 2AR – Gs protein complex; (j) active, ligand-free  $\beta$ 2AR –  $\beta$ -arrestin-2 complex; (k) inactive, ligand-free  $\beta$ 2AR –  $\beta$ -arrestin-2 complex.

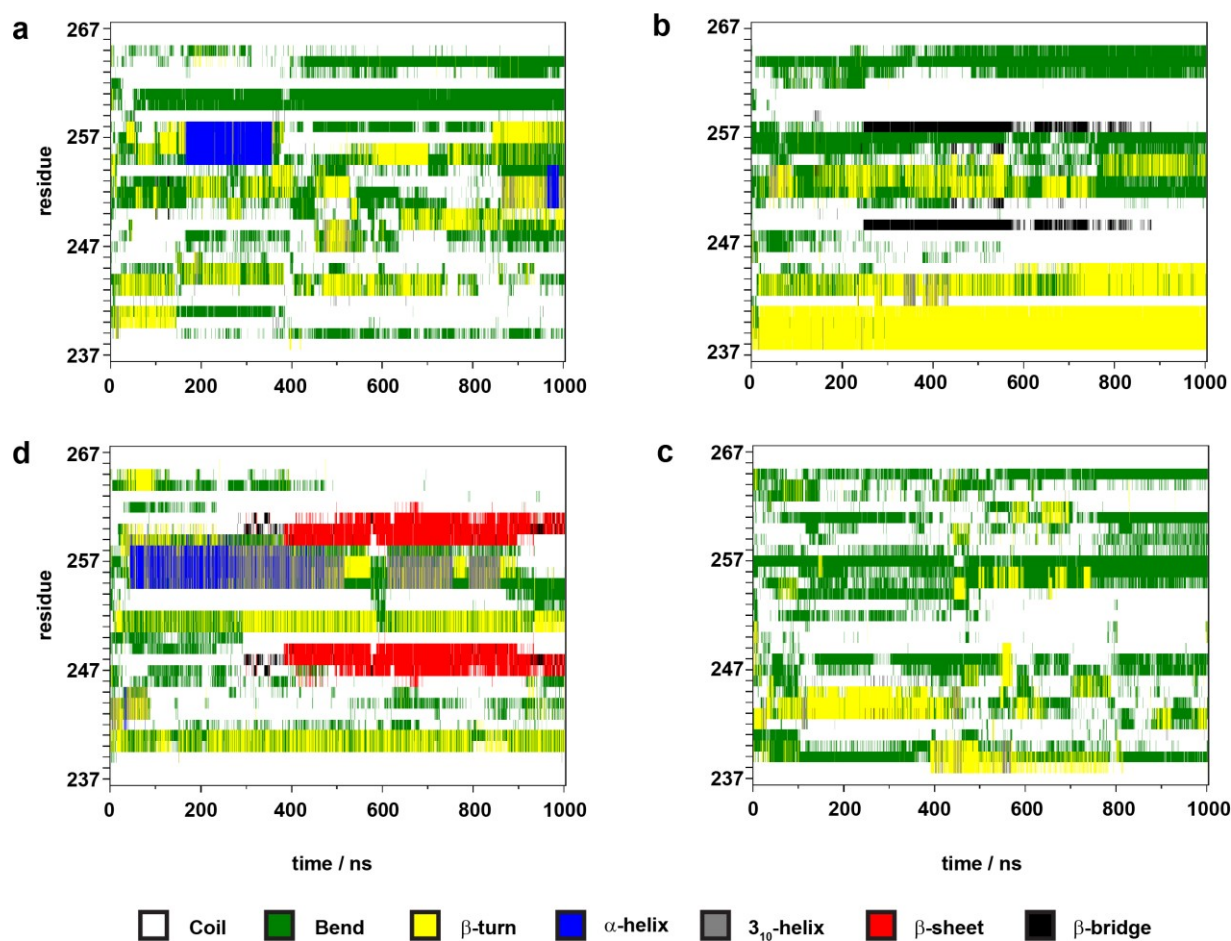

**Figure S9.** Evolution of the secondary structure of ICL3 during simulations. (a) active  $\beta$ 2AR – Gs protein – epinephrine complex, 1st replica; (b) inactive  $\beta$ 2AR – Gs protein – epinephrine complex; (c) active  $\beta$ 2AR –  $\beta$ -arrestin-2 – epinephrine complex; (d) inactive  $\beta$ 2AR –  $\beta$ -arrestin-2 – epinephrine complex.

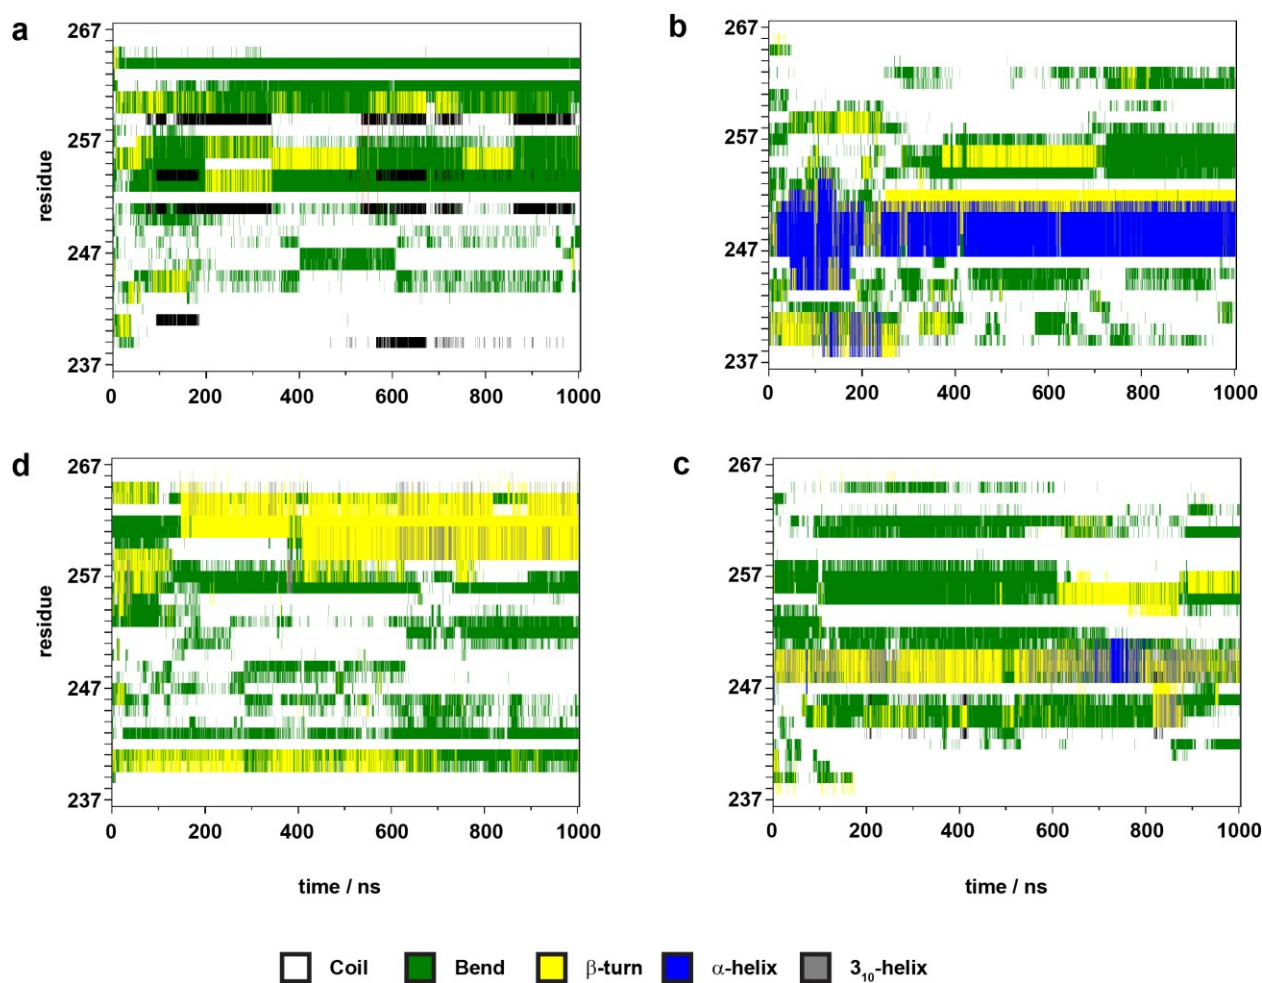

**Figure S10.** Evolution of the secondary structure of ICL3 during simulations. (a) active, ligand-free  $\beta$ 2AR –Gs protein complex; (b) inactive, ligand-free  $\beta$ 2AR –Gs protein complex; (c) active, ligand-free  $\beta$ 2AR –  $\beta$ -arrestin-2 complex; (d) inactive, ligand-free  $\beta$ 2AR –  $\beta$ -arrestin-2 complex.



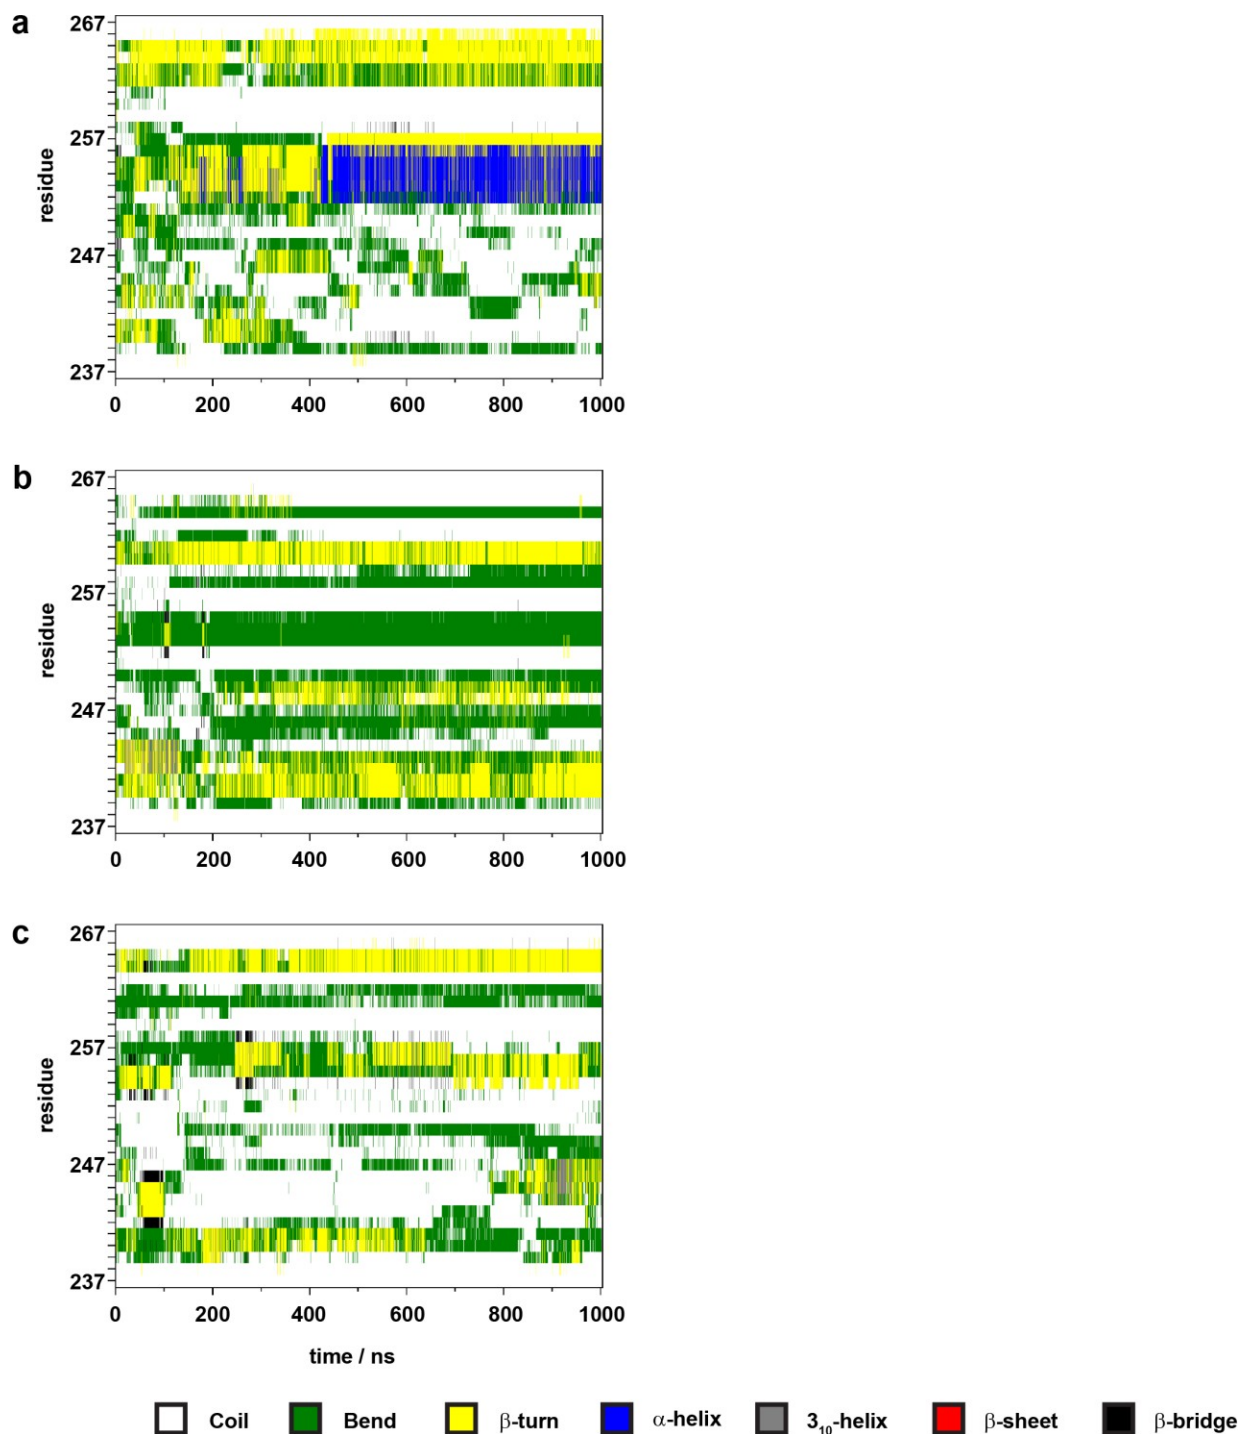

**Figure S11.** Evolution of the secondary structure of ICL3 during simulations. (a) active  $\beta$ 2AR – Gs protein – epinephrine complex, 2nd replica; (b) active  $\beta$ 2AR – Gs protein – epinephrine complex, 3rd replica; (c) active  $\beta$ 2AR – Gs protein – epinephrine complex, with restrained epinephrine and GDP.

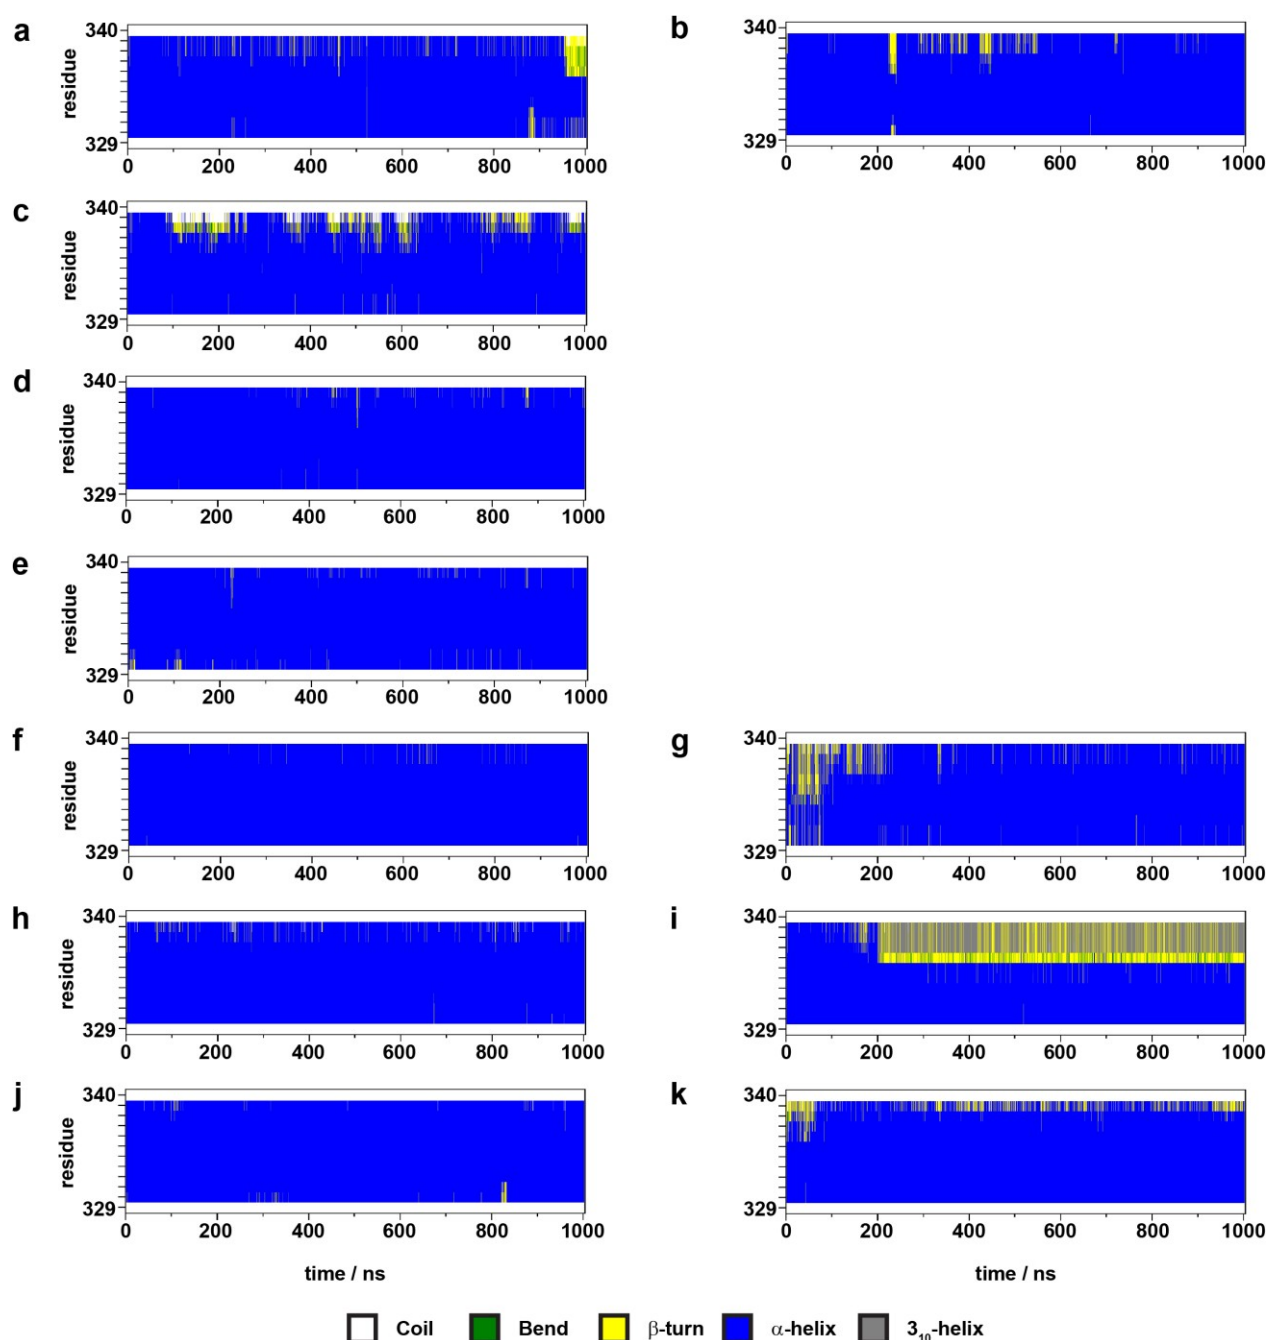

**Figure S12.** Evolution of the secondary structure of H8 during simulations. (a) active  $\beta$ 2AR – Gs protein – epinephrine complex, 1st replica; (b) inactive  $\beta$ 2AR – Gs protein – epinephrine complex; (c) active  $\beta$ 2AR – Gs protein – epinephrine complex, 2nd replica; (d) active  $\beta$ 2AR – Gs protein – epinephrine complex, 3rd replica; (e) active  $\beta$ 2AR – Gs protein – epinephrine complex, with restrained epinephrine and GDP; (f) active  $\beta$ 2AR –  $\beta$ -arrestin-2 – epinephrine complex; (g) inactive  $\beta$ 2AR –  $\beta$ -arrestin-2 – epinephrine complex; (h) active, ligand-free  $\beta$ 2AR – Gs protein complex; (i) inactive, ligand-free  $\beta$ 2AR – Gs protein complex; (j) active, ligand-free  $\beta$ 2AR –  $\beta$ -arrestin-2 complex; (k) inactive, ligand-free  $\beta$ 2AR –  $\beta$ -arrestin-2 complex.

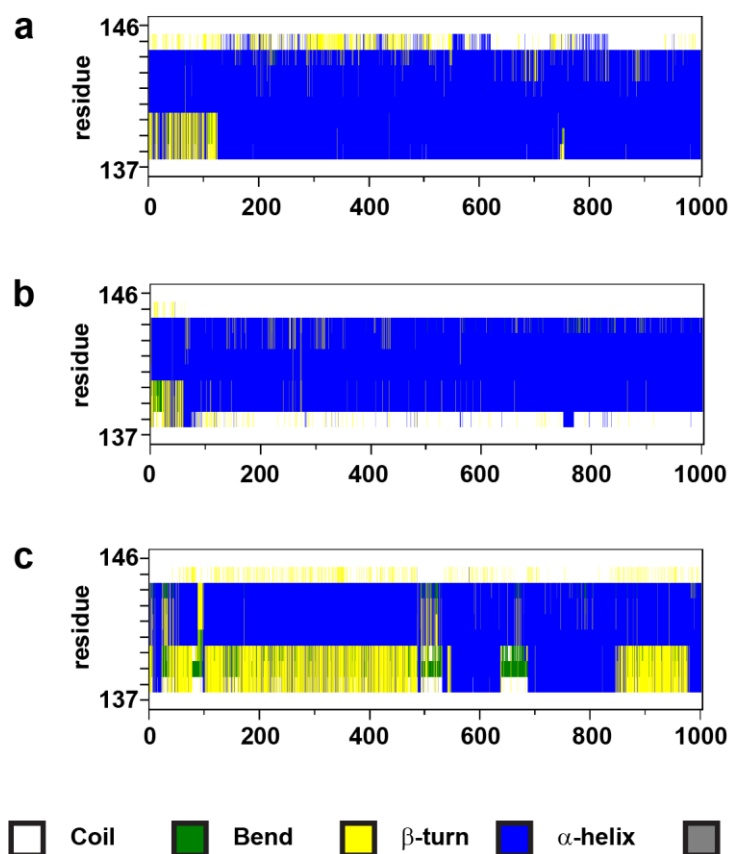

**Figure S13.** Evolution of the secondary structure of ICL2 during simulations. (a) active  $\beta$ 2AR – Gs protein – epinephrine complex, 2nd replica; (b) active  $\beta$ 2AR – Gs protein – epinephrine complex, 3rd replica; (c) active.  $\beta$ 2AR – Gs protein – epinephrine complex, with restrained epinephrine and GDP.

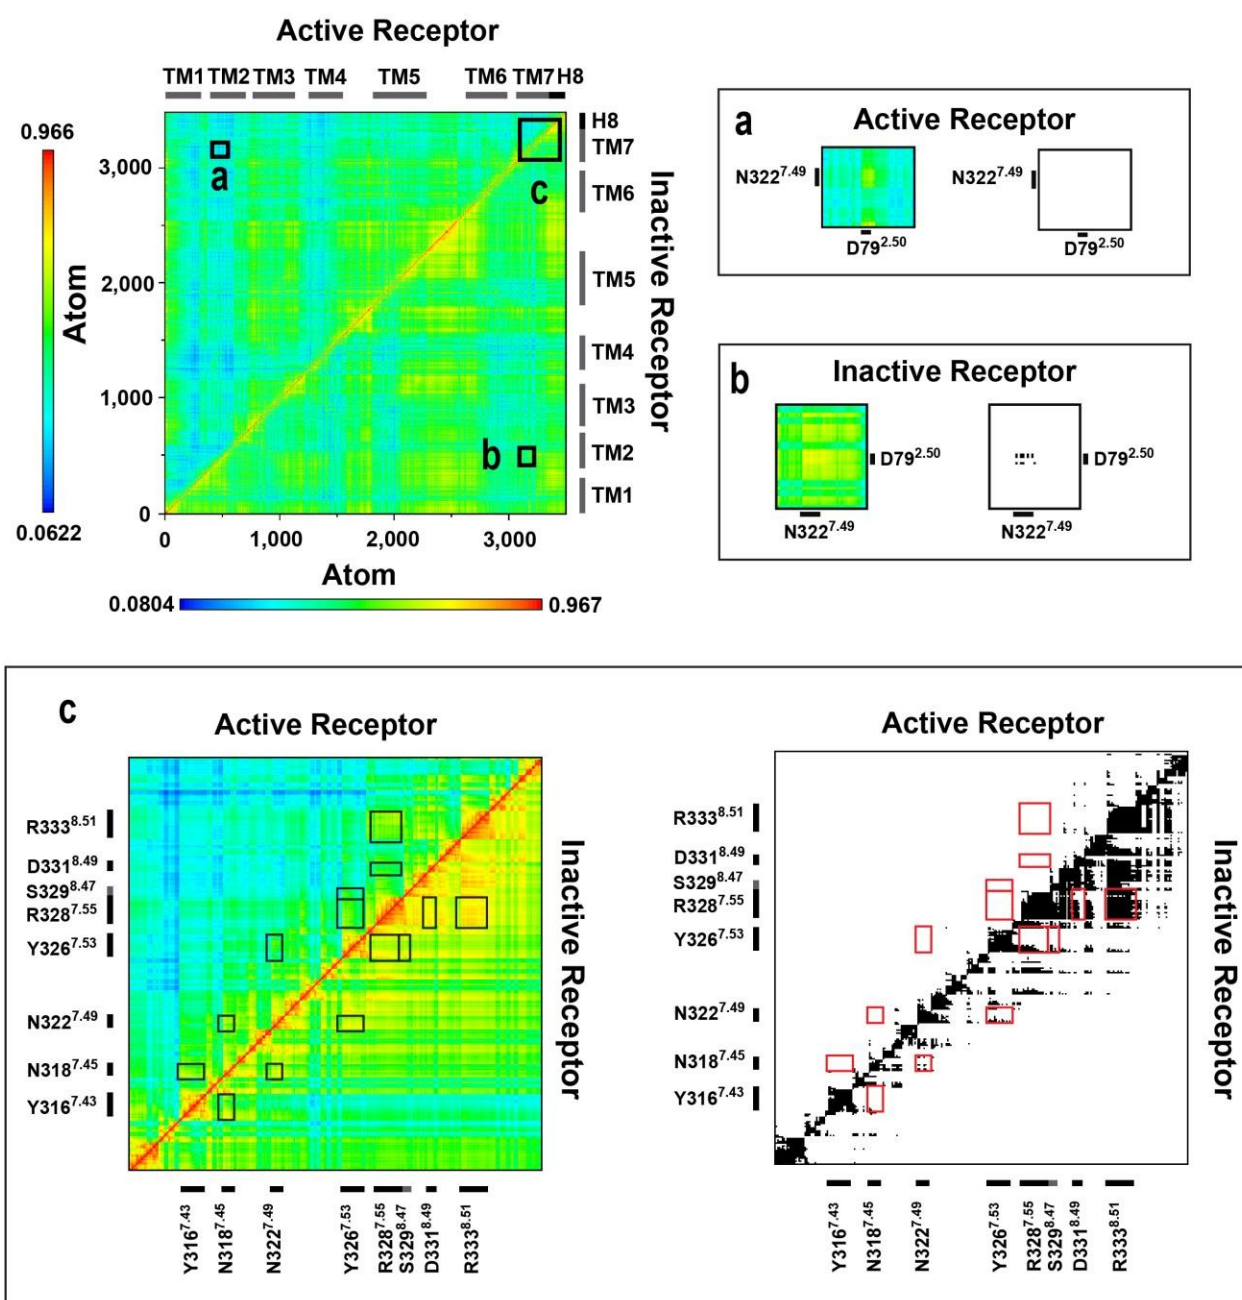

**Figure S14.** Representative dynamic cross-correlation matrices of the G<sub>s</sub> protein-bound  $\beta$ 2AR in the active and inactive, ligand-free states. Panels (a–c) are magnified views of regions of amino acid residues of interest. Black and white panels show correlations above the threshold of 0.65 MI. Dynamic cross-correlation matrices of all studied systems are available upon request.



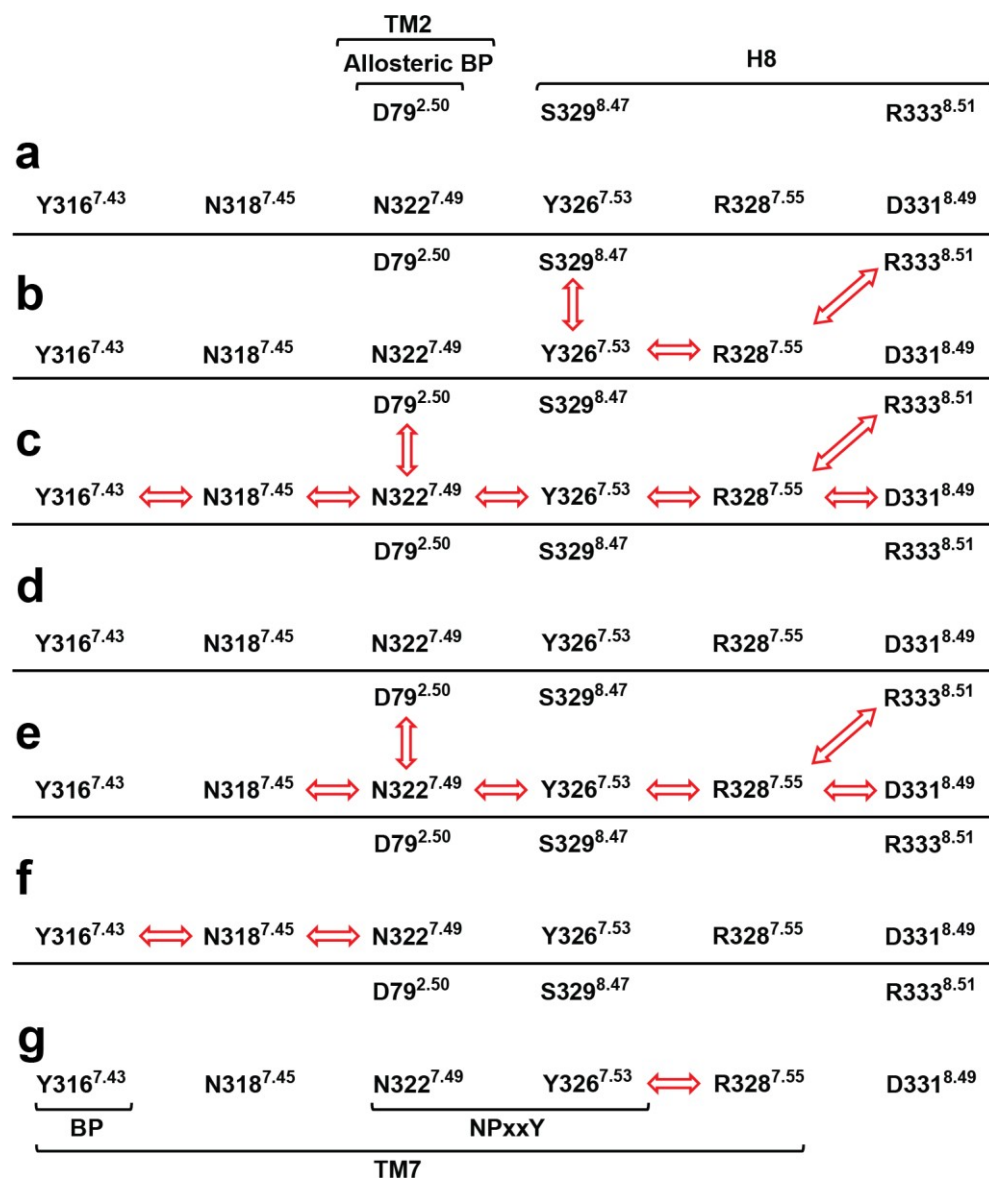

**Figure S15.** The polar signaling channel of the Gs protein or  $\beta$ -arrestin-2-bound  $\beta$ 2AR analyzed by dynamic cross correlation analysis. (a) active  $\beta$ 2AR – Gs protein – epinephrine complex, 2nd replica; (b) active  $\beta$ 2AR – Gs protein – epinephrine complex, 3rd replica; (c) active  $\beta$ 2AR – Gs protein – epinephrine complex, with restrained epinephrine and GDP; (d) active, ligand-free  $\beta$ 2AR – Gs protein complex; (e) inactive, ligand-free.  $\beta$ 2AR – Gs protein complex; (f) active, ligand-free  $\beta$ 2AR –  $\beta$ -arrestin-2 complex; (g) inactive, ligand-free  $\beta$ 2AR –  $\beta$ -arrestin-2 complex. Red arrows indicate correlated motions of the respective amino acids.
